# Supplementary material for: Treatment-Related Adverse Events with PD-1 or PD-L1 Inhibitors: A Systematic Review and Meta-Analysis
Source: MDPI journal article supplement (doi:10.3390/life11111277), 2021-11-22
Supplement: s1 [file s1]

|                   | Random sequence generation (selection bias) | Allocation concealment (selection bias) | Blinding of participants and personnel (performance bias) | Blinding of outcome assessment (detection bias) | Incomplete outcome data (attrition bias) | Selective reporting (reporting bias) | Other bias |
|-------------------|---------------------------------------------|-----------------------------------------|-----------------------------------------------------------|-------------------------------------------------|------------------------------------------|--------------------------------------|------------|
| A.Eggermont 2020  | +                                           | +                                       | +                                                         | +                                               | +                                        | +                                    | +          |
| A.Sezer 2021      | +                                           | +                                       | +                                                         | +                                               | +                                        | +                                    | ?          |
| B.Burtness 2019   | +                                           | +                                       | +                                                         | +                                               | +                                        | +                                    | ?          |
| Bang 2018         | +                                           | ?                                       | +                                                         | +                                               | +                                        | +                                    | ?          |
| C.Robert 2019 q2w | +                                           | +                                       | +                                                         | +                                               | +                                        | +                                    | ?          |
| C.Robert 2020     | +                                           | +                                       | +                                                         | +                                               | +                                        | +                                    | ?          |
| C.Robert 2020 q3w | +                                           | +                                       | +                                                         | +                                               | +                                        | +                                    | ?          |
| Carbone 2017      | +                                           | +                                       | +                                                         | +                                               | +                                        | +                                    | ?          |
| D.R.Spigel 2021   | +                                           | +                                       | +                                                         | +                                               | +                                        | +                                    | ?          |
| D.Reardon 2020    | +                                           | ?                                       | +                                                         | +                                               | +                                        | +                                    | ?          |
| E.Cohen 2019      | +                                           | ?                                       | +                                                         | +                                               | +                                        | +                                    | +          |
| E.Winer 2021      | +                                           | +                                       | +                                                         | +                                               | +                                        | +                                    | ?          |
| H.Borghaei 2020.1 | +                                           | ?                                       | +                                                         | +                                               | +                                        | +                                    | ?          |
| H.Borghaei 2020.2 | +                                           | ?                                       | +                                                         | +                                               | +                                        | +                                    | ?          |
| Hodi 2018         | +                                           | +                                       | +                                                         | +                                               | +                                        | +                                    | +          |
| J.Bellmunt 2021   | +                                           | ?                                       | +                                                         | +                                               | +                                        | +                                    | ?          |
| J.Huang 2020      | +                                           | +                                       | +                                                         | +                                               | +                                        | +                                    | ?          |
| J.Kuruvilla 2021  | +                                           | ?                                       | +                                                         | +                                               | +                                        | +                                    | ?          |
| J.Mazieres 2020.1 | +                                           | ?                                       | +                                                         | +                                               | +                                        | +                                    | ?          |
| J.Mazieres 2020.2 | +                                           | ?                                       | +                                                         | +                                               | +                                        | +                                    | ?          |
| J.Pujol 2019      | +                                           | +                                       | +                                                         | +                                               | +                                        | +                                    | +          |
| K.Kato 2019       | +                                           | +                                       | +                                                         | +                                               | +                                        | +                                    | +          |
| K.Park 2021       | +                                           | +                                       | +                                                         | +                                               | +                                        | +                                    | ?          |
| K.Shitara 2020    | +                                           | +                                       | +                                                         | +                                               | +                                        | +                                    | ?          |
| L.Paz Ares 2020   | +                                           | +                                       | +                                                         | +                                               | +                                        | +                                    | ?          |
| L.Wu 2020         | +                                           | +                                       | +                                                         | +                                               | +                                        | +                                    | ?          |
| Larkin 2018       | +                                           | +                                       | +                                                         | +                                               | +                                        | +                                    | ?          |
| M.D.Galsky 2020   | +                                           | +                                       | +                                                         | +                                               | +                                        | +                                    | ?          |
| M.Heijden 2021    | +                                           | +                                       | +                                                         | +                                               | +                                        | +                                    | ?          |
| M.Reck 2019       | +                                           | +                                       | +                                                         | +                                               | +                                        | +                                    | ?          |
| P.Ascierio 2020   | +                                           | +                                       | +                                                         | +                                               | +                                        | +                                    | ?          |
| R.Ferris 2019     | +                                           | +                                       | +                                                         | +                                               | +                                        | +                                    | ?          |
| R.Ferris 2020     | +                                           | +                                       | +                                                         | +                                               | +                                        | +                                    | ?          |
| R.Kelly 2021      | +                                           | +                                       | +                                                         | +                                               | +                                        | +                                    | +          |
| R.Motzer 2020     | +                                           | +                                       | +                                                         | +                                               | +                                        | +                                    | ?          |
| S.Finn 2019       | +                                           | +                                       | +                                                         | +                                               | +                                        | +                                    | +          |
| S.Herbst 2020     | +                                           | ?                                       | +                                                         | +                                               | +                                        | +                                    | ?          |
| S.Herbst 2020.1   | +                                           | ?                                       | +                                                         | +                                               | +                                        | +                                    | ?          |
| S.Herbst 2020.2   | +                                           | ?                                       | +                                                         | +                                               | +                                        | +                                    | ?          |
| S.Lu 2020         | +                                           | ?                                       | +                                                         | +                                               | +                                        | +                                    | ?          |
| T.Andre 2020      | +                                           | ?                                       | +                                                         | +                                               | +                                        | +                                    | ?          |
| T.Kojima 2020     | +                                           | +                                       | +                                                         | +                                               | +                                        | +                                    | ?          |
| T.Mok 2019        | +                                           | +                                       | +                                                         | +                                               | +                                        | +                                    | ?          |
| T.Powles 2020     | +                                           | ?                                       | +                                                         | +                                               | +                                        | +                                    | ?          |
| Y.Fradet 2019     | +                                           | +                                       | +                                                         | +                                               | +                                        | +                                    | ?          |

**Figure S1.** The risk of bias summary

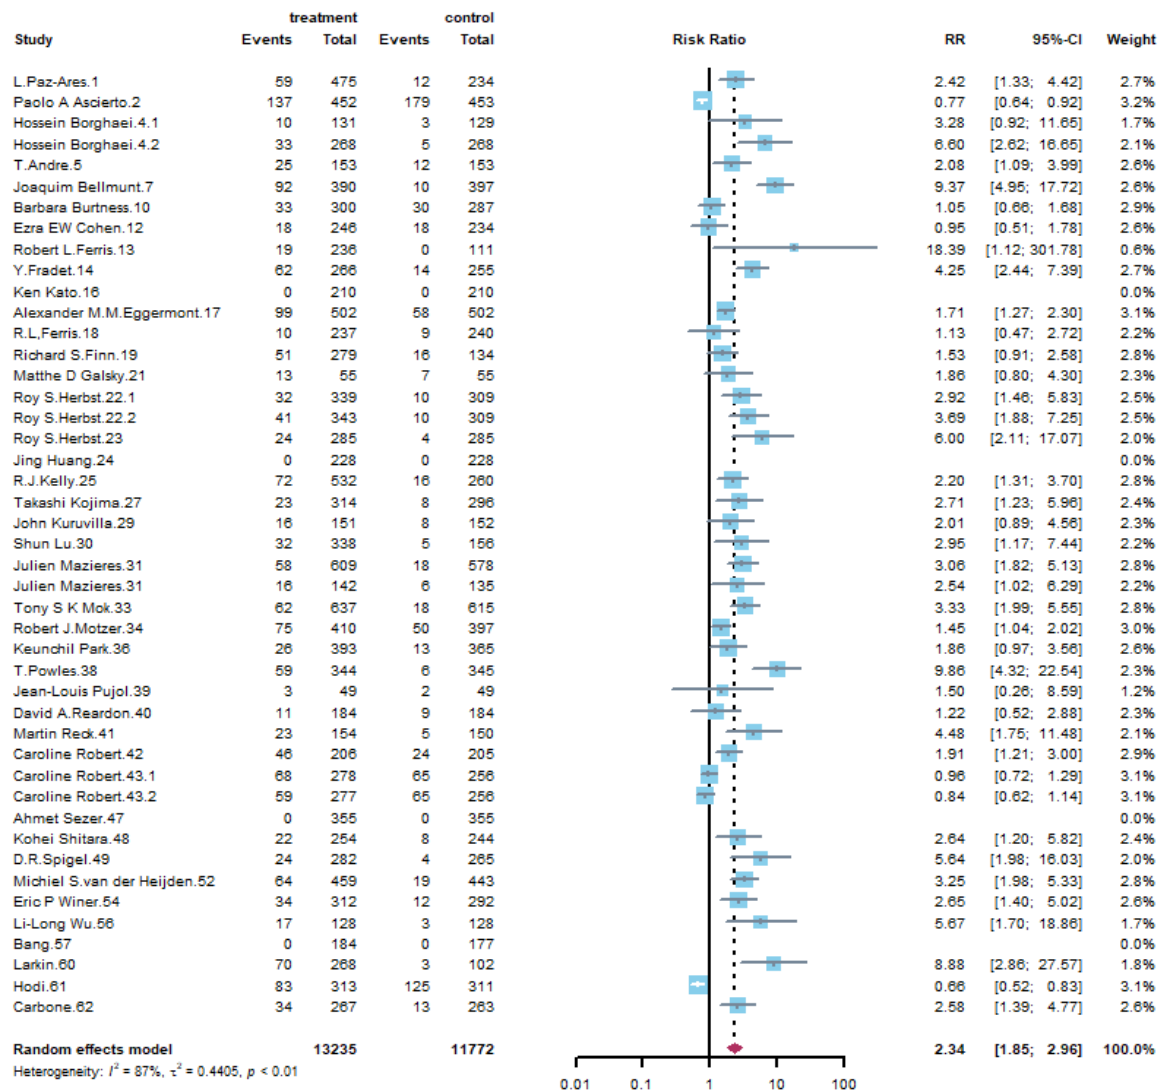

**Figure S2.** Forest plot of all grade pruritus for PD-1/PD-L1 inhibitors compared with control groups.

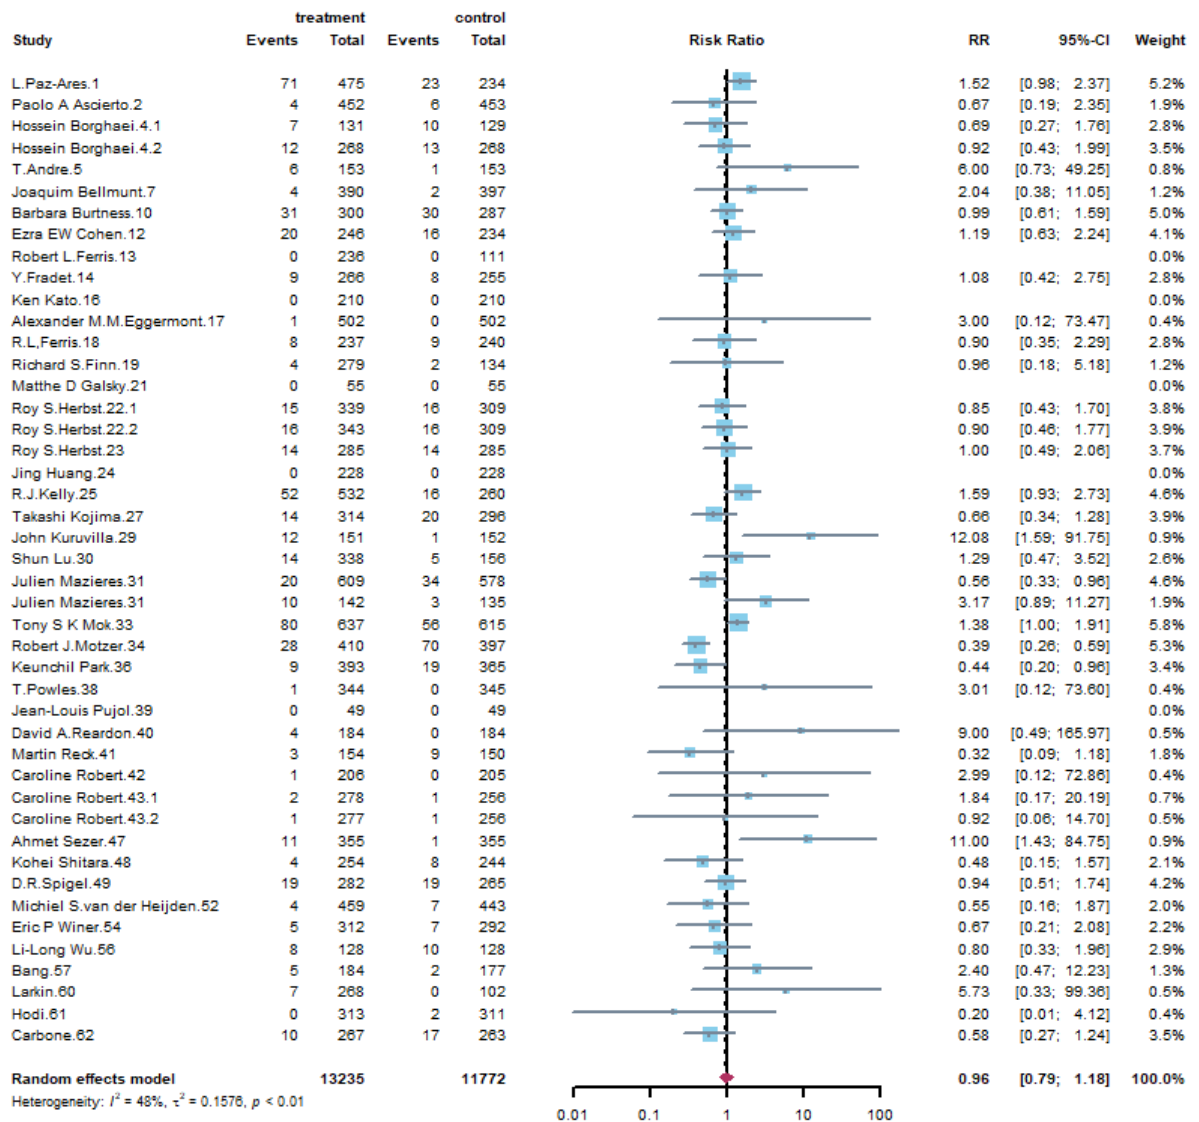

**Figure S3.** Forest plot of all grade pneumonia for PD-1/PD-L1 inhibitors compared with control groups.

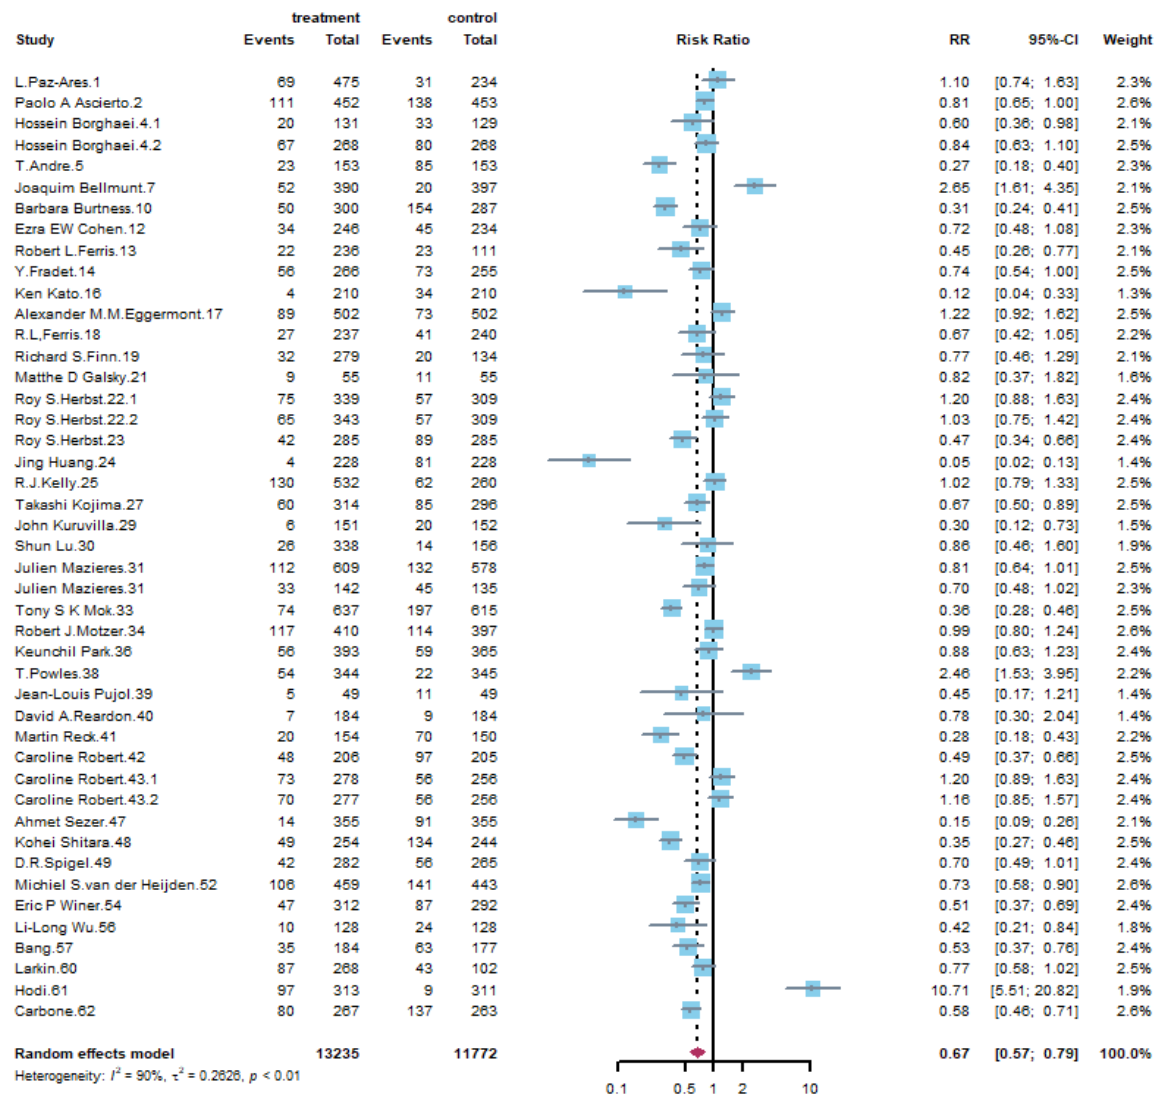

**Figure S4.** Forest plot of all grade nausea for PD-1/PD-L1 inhibitors compared with control groups.

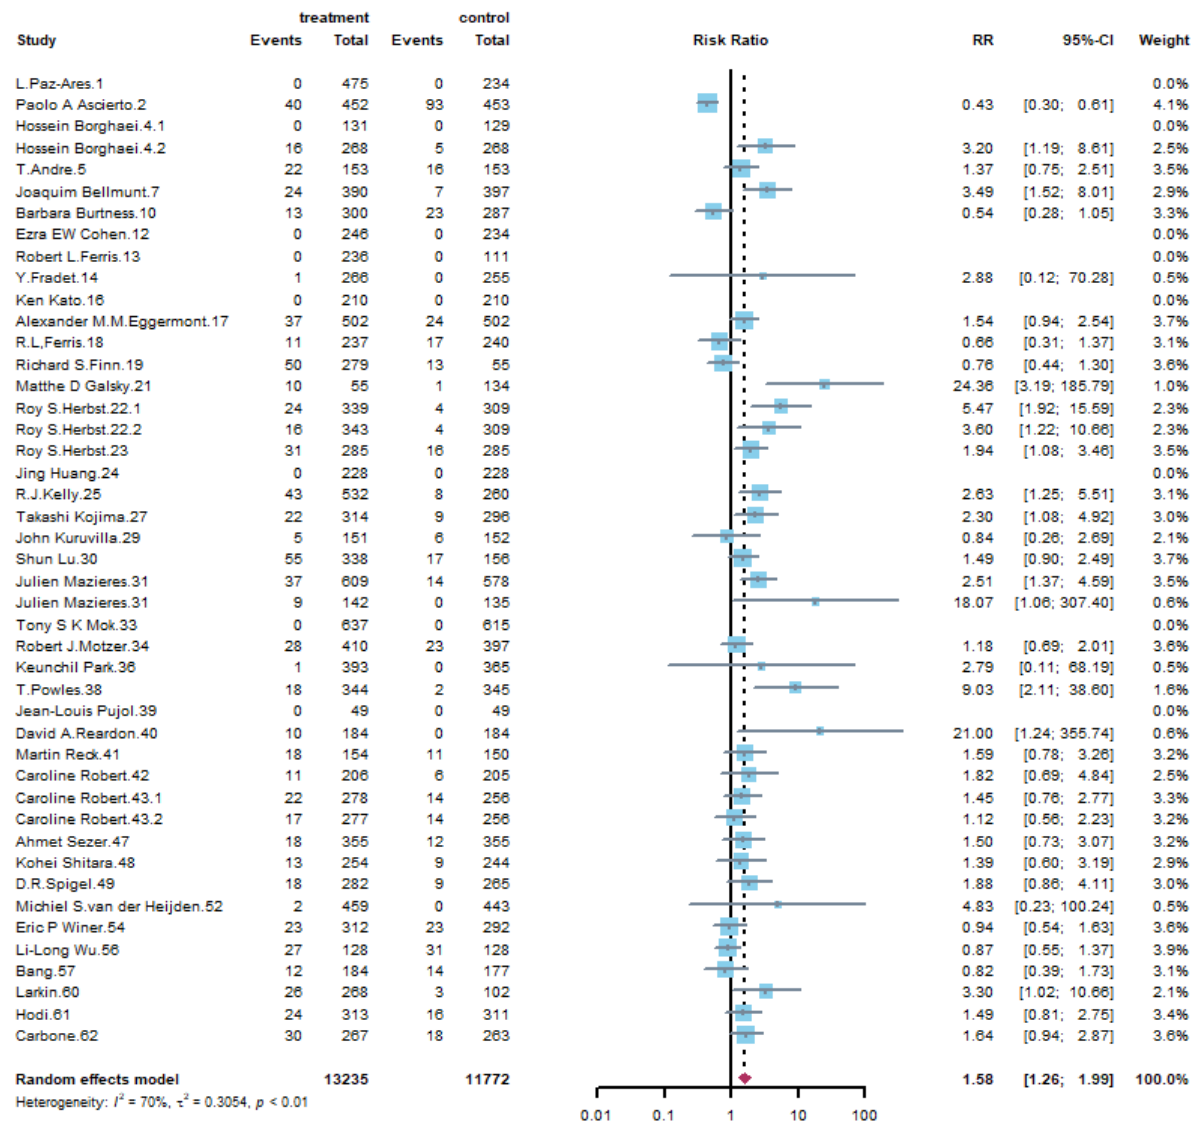

**Figure S5.** Forest plot of all grade ALT elevation for PD-1/PD-L1 inhibitors compared with control groups.

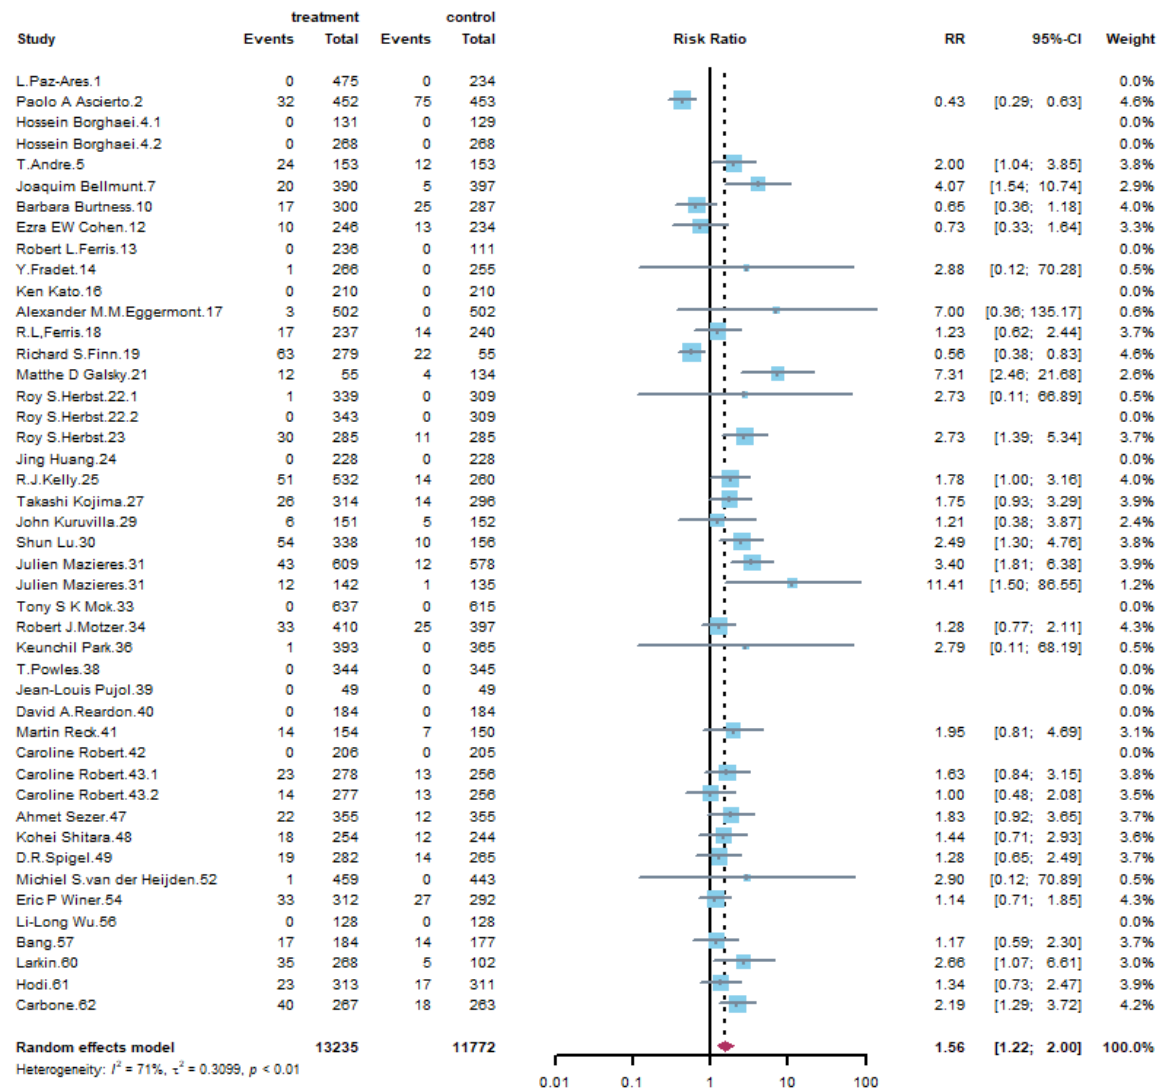

**Figure S6.** Forest plot of all grade AST elevation for PD-1/PD-L1 inhibitors compared with control groups.

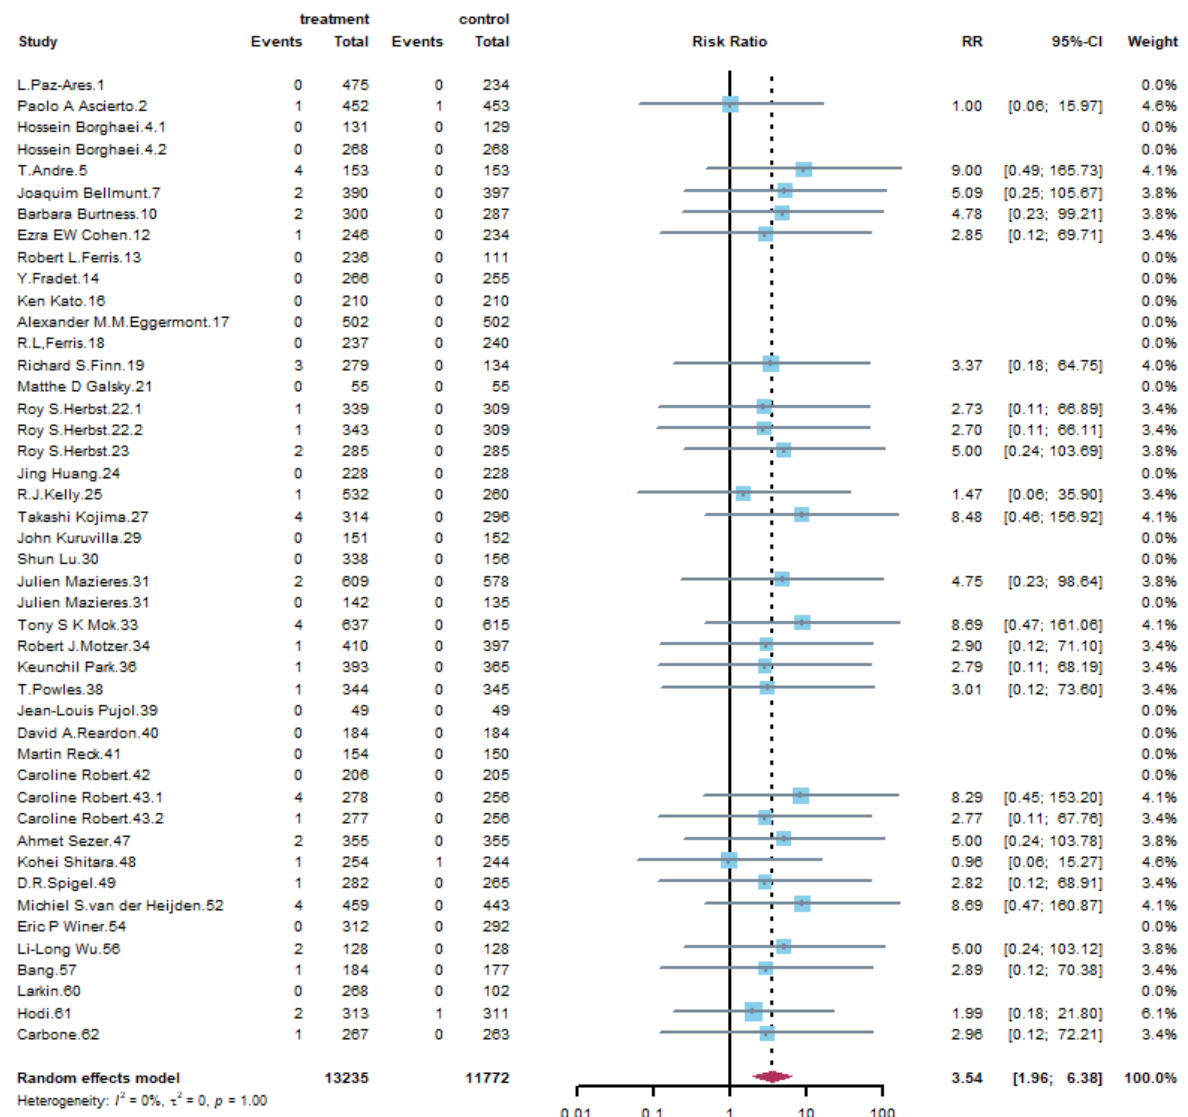

**Figure S7.** Forest plot of all grade hepatitis for PD-1/PD-L1 inhibitors compared with control groups.

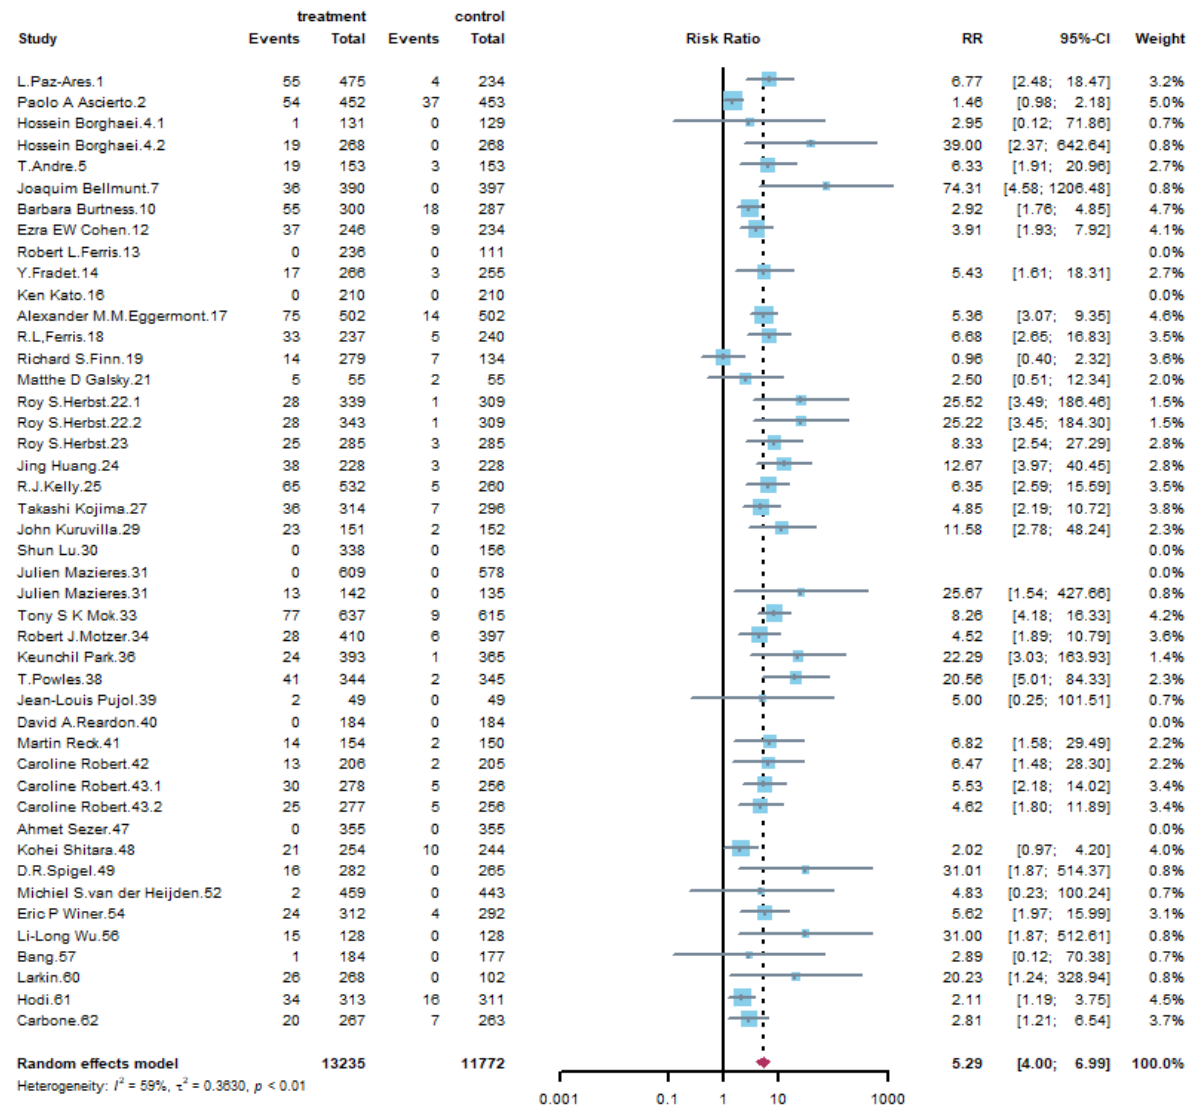

**Figure S8.** Forest plot of all grade hypothyroid for PD-1/PD-L1 inhibitors compared with control groups.



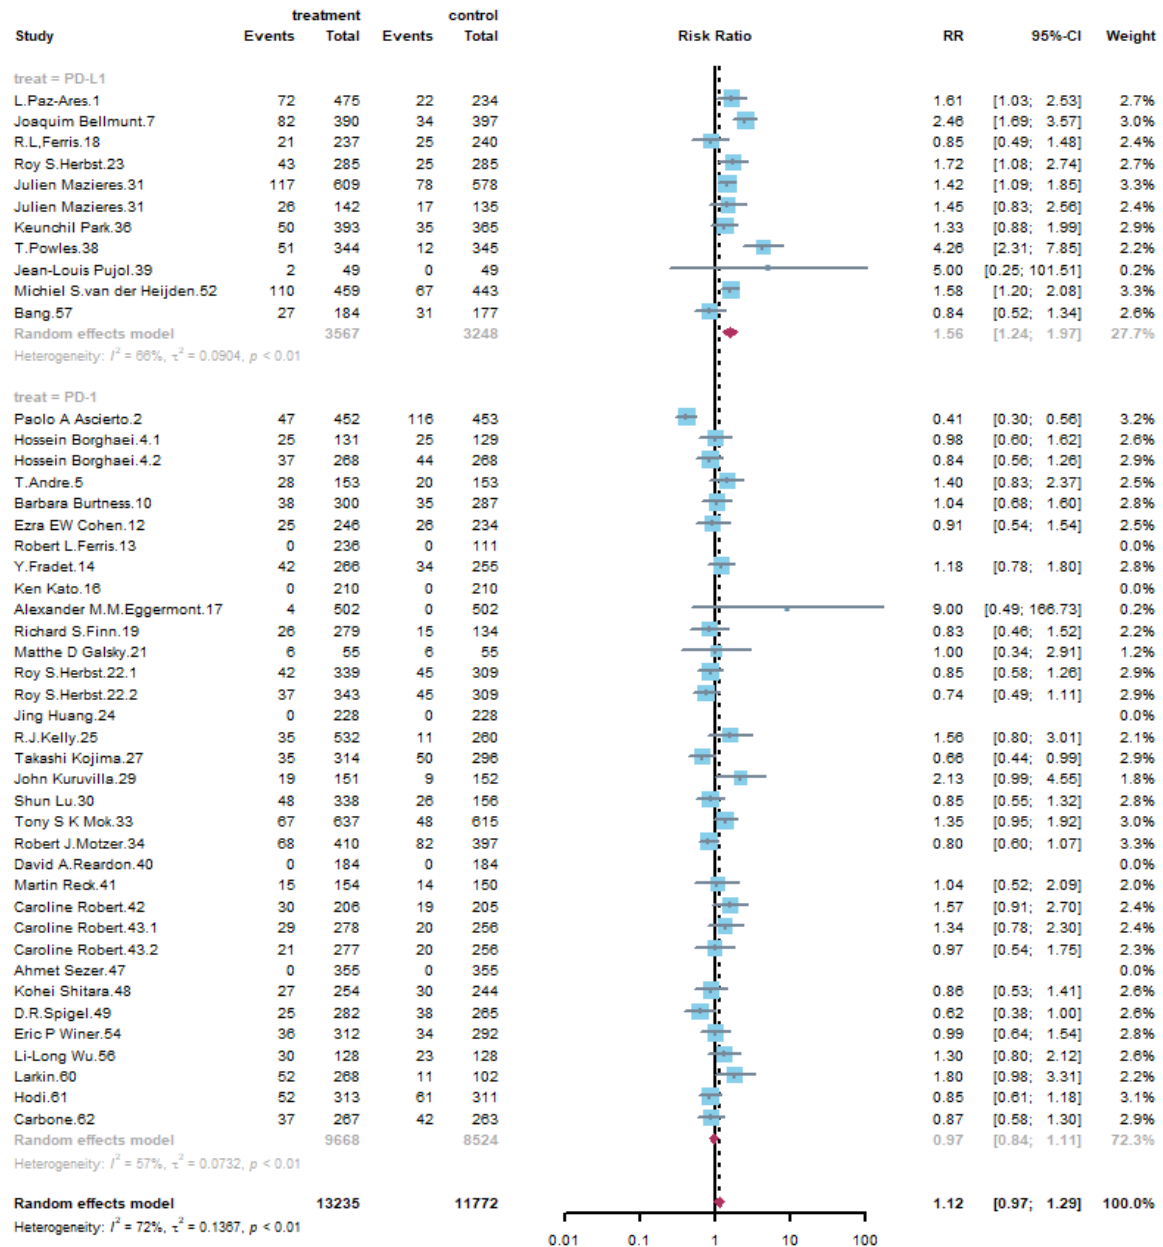

**Figure S9.** Forest plot of all grade fever for PD-1 or PD-L1 inhibitors compared with control groups.

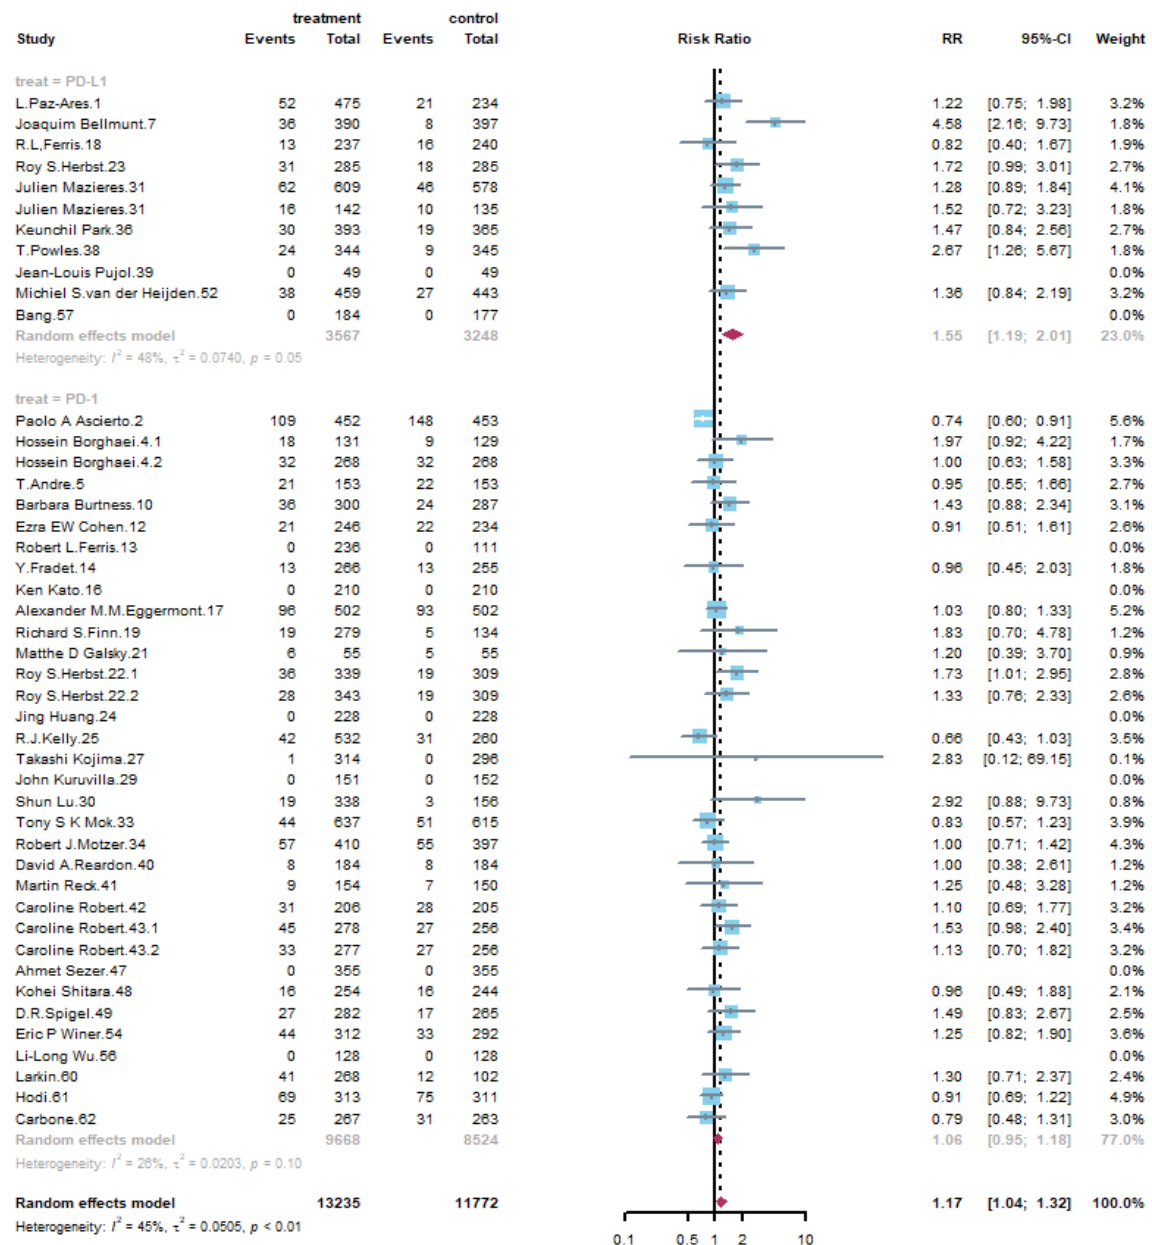

**Figure S10.** Forest plot of all grade headache for PD-1 or PD-L1 inhibitors compared with control groups.

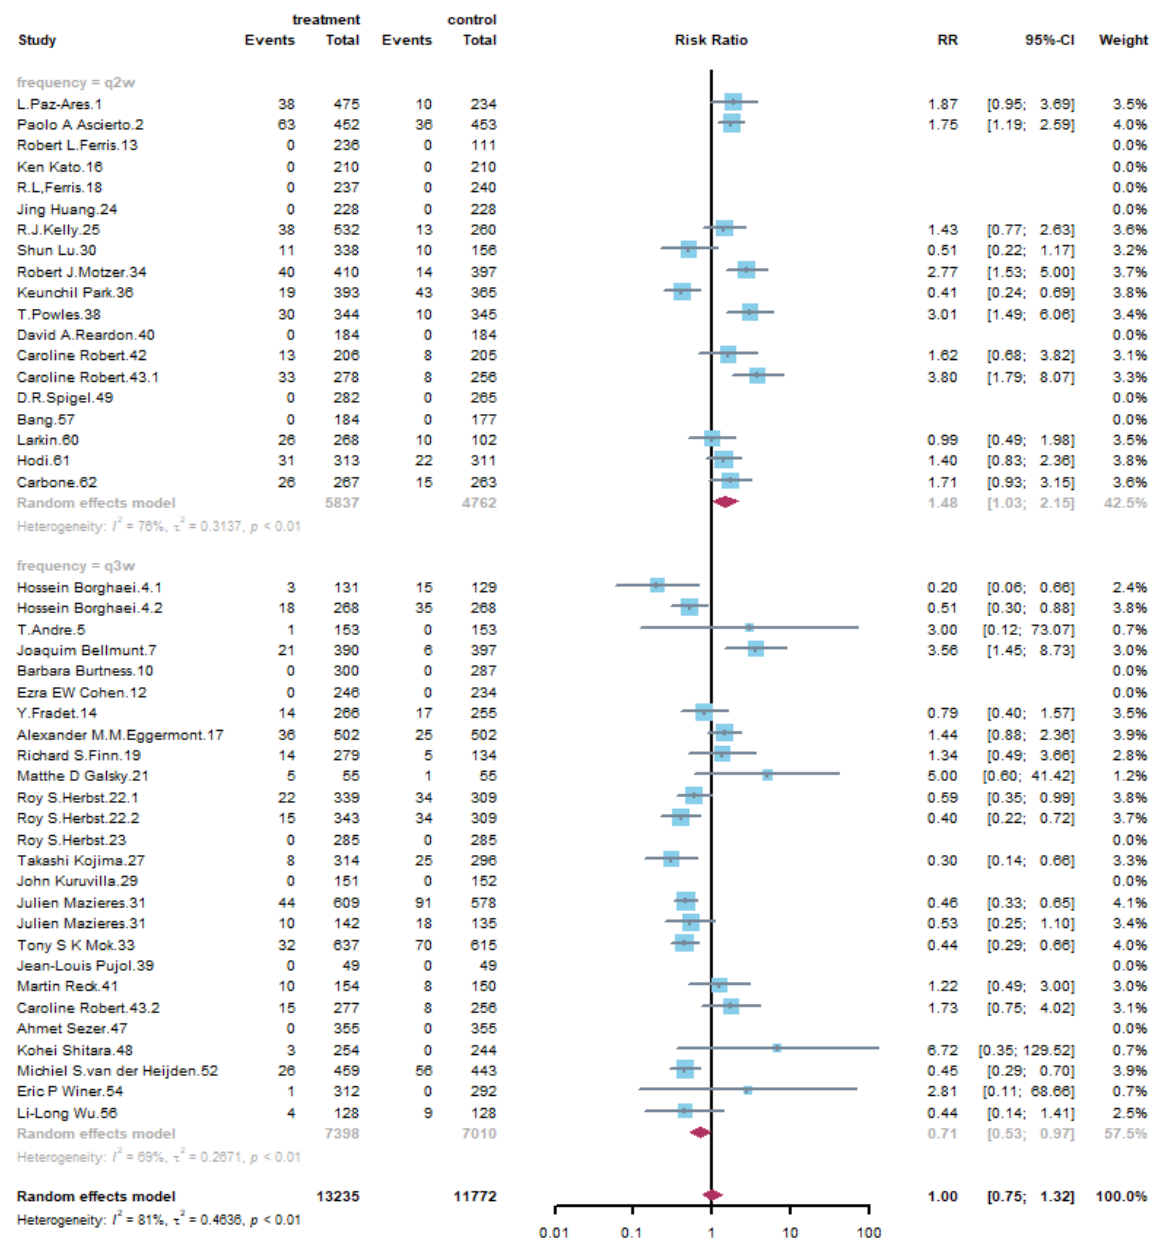

**Figure S11.** Forest plot of myalgia in subgroup analysis by different treatment frequency

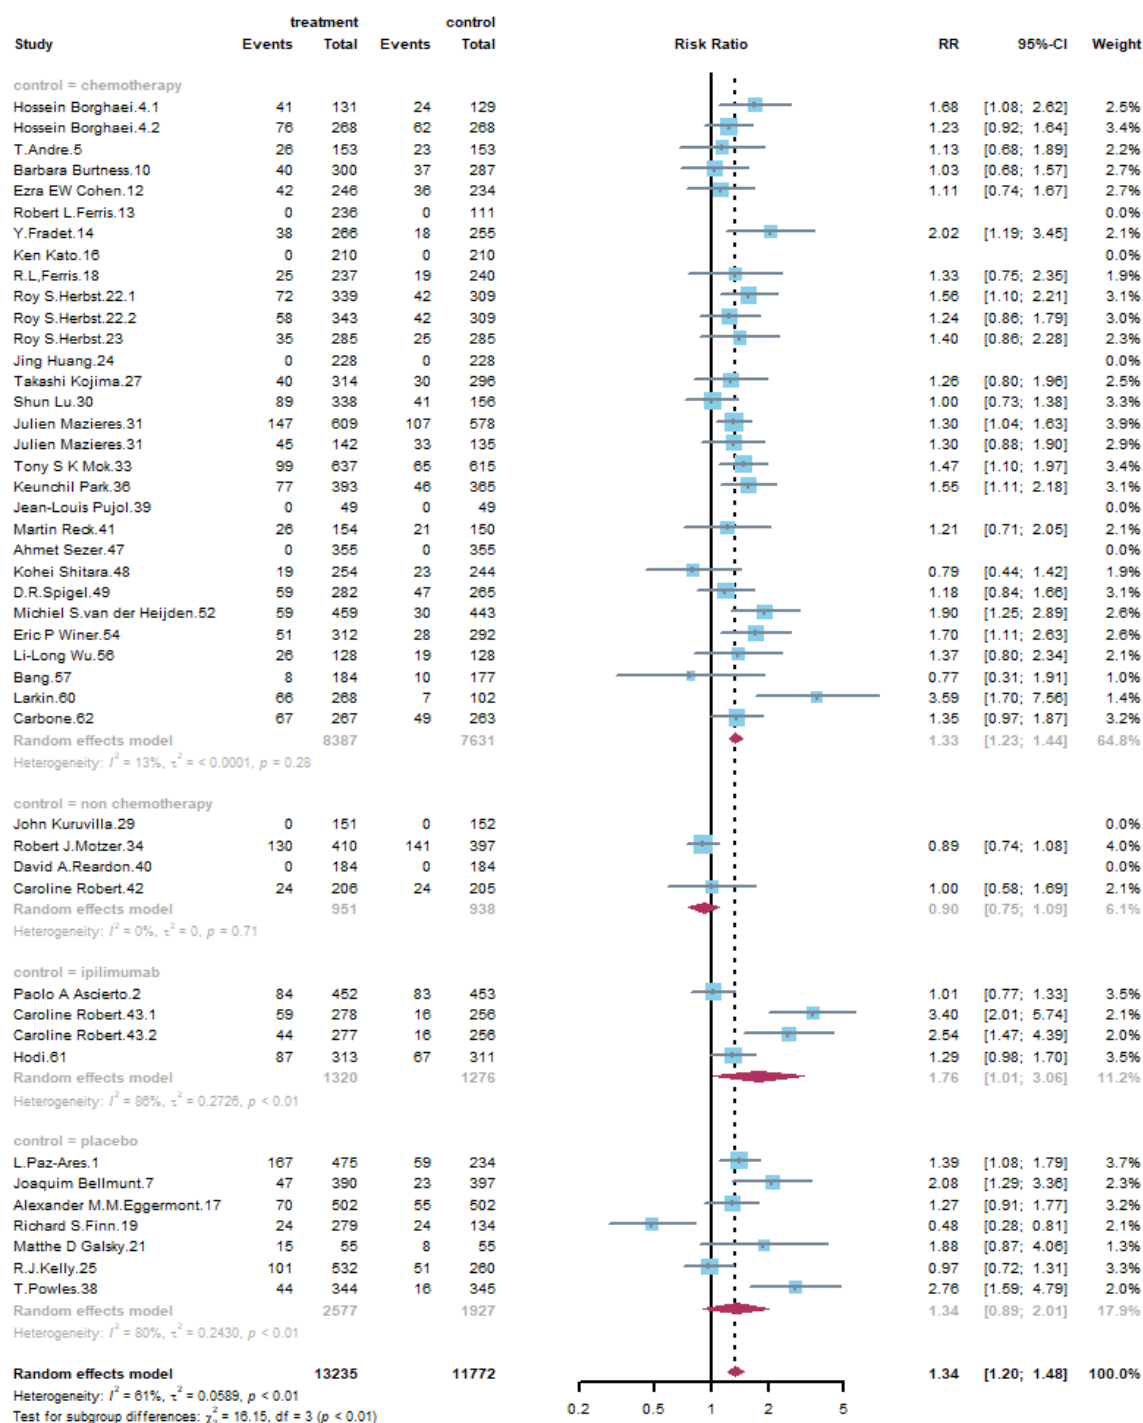

**Figure S12.** Forest plot of all grade cough in subgroup analysis by different control groups.

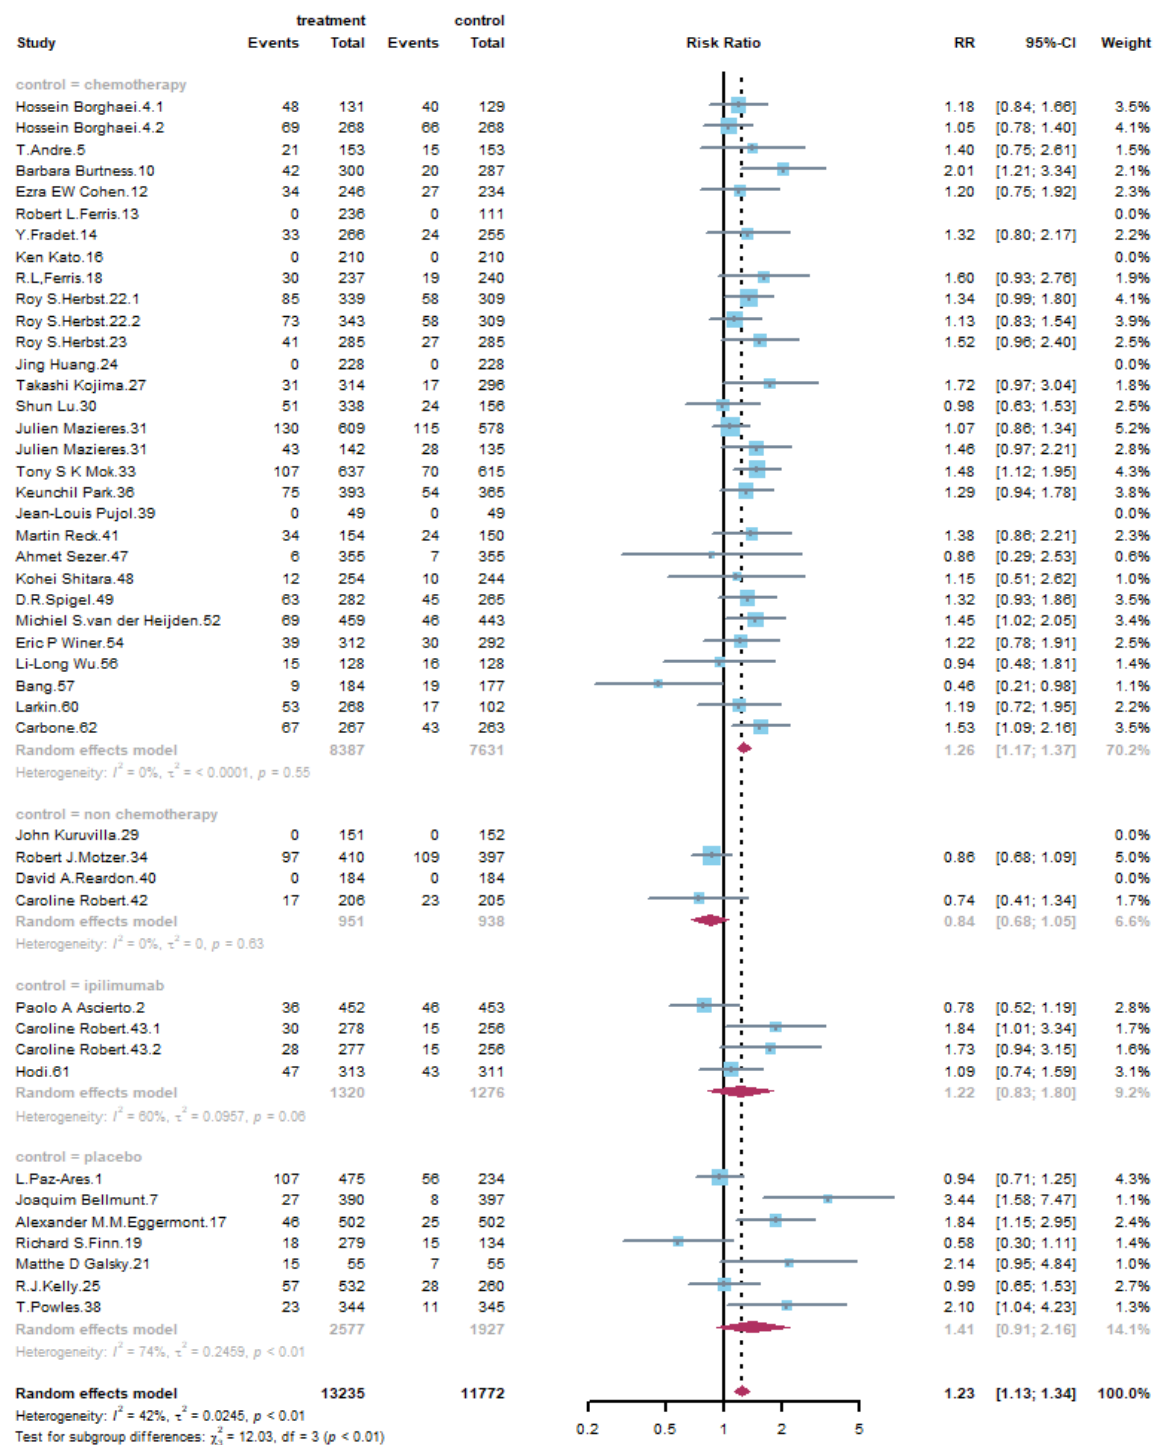

**Figure S13.** Forest plot of all grade dyspnea in subgroup analysis by different control groups.
